# Supplementary material
Source: PubMed Central journal article supplement (PMC4065838)
Supplement: NIHMS590081-supplement-1.pdf [file NIHMS590081-supplement-1.pdf]

R. Schmitt, et al.

## The combined role of galactose-deficient IgA and streptococcal IgA-binding M protein in inducing IL-6 and C3 secretion from human mesangial cells: implications for IgA nephropathy

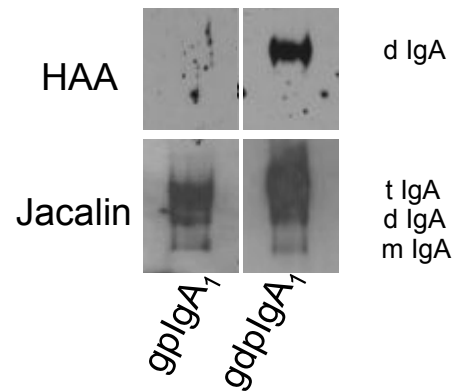

Supplementary Figure 1

### Supplementary figure 1: Lectin binding assay of polymeric IgA1 proteins

IgA1 proteins (gpIgA1: galactosylated polymeric IgA1 from pooled control sera, gdpIgA1: galactose-deficient polymeric IgA1-IgAN) separated by SDS-PAGE under non-reducing conditions were transferred onto nitrocellulose membranes and analyzed using biotinylated *Helix aspersa* lectin (HAA; specific for terminal *N*-acetylgalactosamine; Sigma) or jacalin (specific for disaccharide *N*-acetylgalactosamine-galactose; Vector Laboratories, Burlingame, CA) and detected with avidin-peroxidase conjugate and chemiluminescence as described (1). Galactose-deficient polymeric IgA1 characterized by binding to HAA was only detected in gdpIgA1 and was predominantly in a dimeric molecular form. In contrast, all three molecular forms of both types of IgA1 reacted with jacalin. m IgA, monomeric IgA; d IgA, dimeric IgA, t IgA, trimeric IgA.

### Reference

Suzuki, H., R. Fan, Z. Zhang, R. Brown, S. Hall, B. A. Julian, W. W. Chatham, Y. Suzuki, R. J. Wyatt, Z. Moldoveanu, J. Y. Lee, J. Robinson, M. Tomana, Y. Tomino, J. Mestecky, and J. Novak. 2009. Aberrantly glycosylated IgA1 in IgA nephropathy patients is recognized by IgG antibodies with restricted heterogeneity. *J Clin Invest* 119:1668-1677.
